# Supplementary material for: miR-363-3p inhibits tumor growth by targeting PCNA in lung adenocarcinoma
Source: PubMed Central journal article supplement (PMC5386750; doi:10.18632/oncotarget.15448), 2017-02-17
Supplement: oncotarget-08-20133-s001.pdf [file oncotarget-08-20133-s001.pdf]

# miR-363-3p inhibits tumor growth by targeting PCNA in lung adenocarcinoma

## SUPPLEMENTARY FIGURES AND TABLES

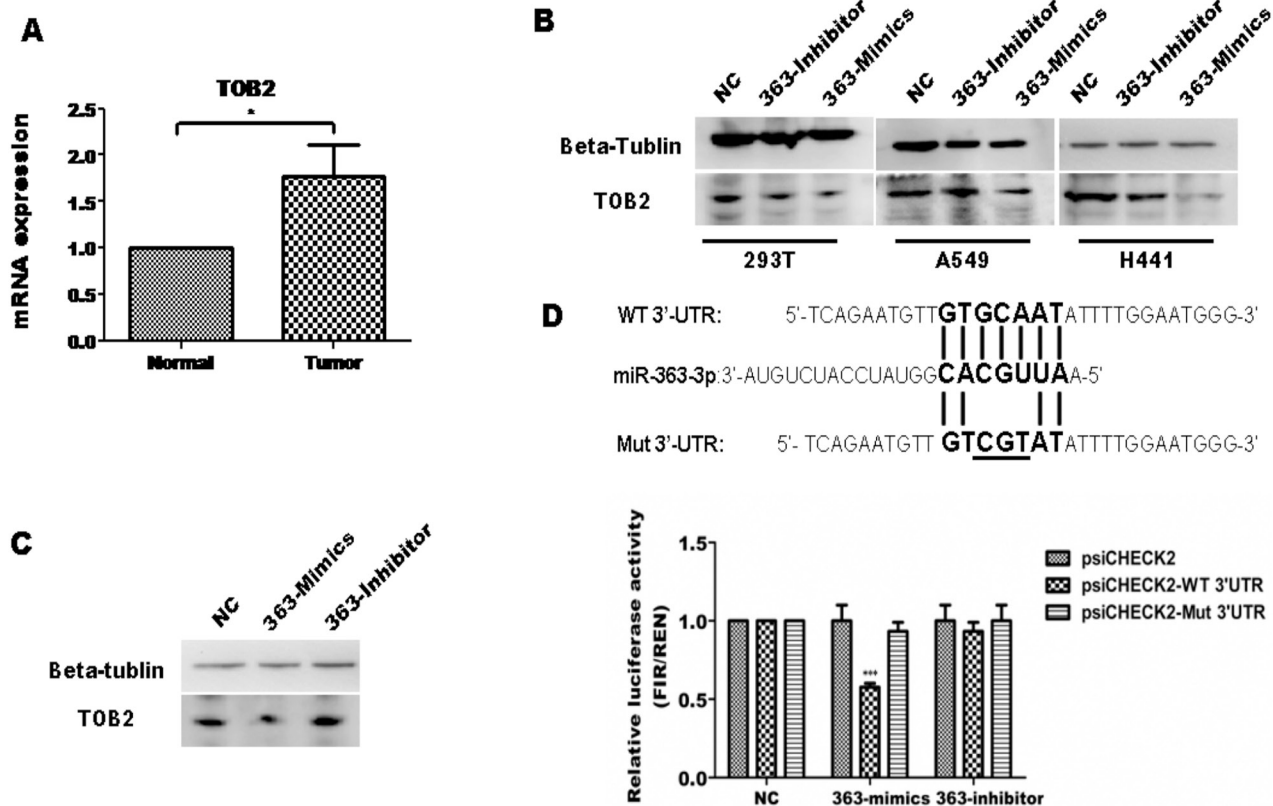

**Supplementary Figure 1:** A. Expression of Tob2 in lung cancer tissues compared with adjacent non-cancerous tissues. GAPDH was used as an internal control. (\* P < 0.005 vs. Normal). B. The protein levels of Tob2 were examined by Western blotting for three cell lines infected with either lenti-NC, lenti-363-mimic or lenti-363-inhibitor. C. Expression of Tob2 in tumors from the nude mouse xenograft model was examined by Western blotting. D. The predicted miR-363-3p binding site in the 3'UTR of the Tob2 mRNA was cloned into psiCHECK2 reporter vector, and a corresponding mutant was constructed. The constructs were then transfected into 293T, A549 and H441 cells, which were infected with either lenti-NC, lenti-363-mimic or lenti-363-inhibitor. The data are expressed as the means ± SEM (n = 3), with results representative of 3 independent experiments. (\*\* p < 0.01 and \*\*\* p < 0.001 vs. NC).

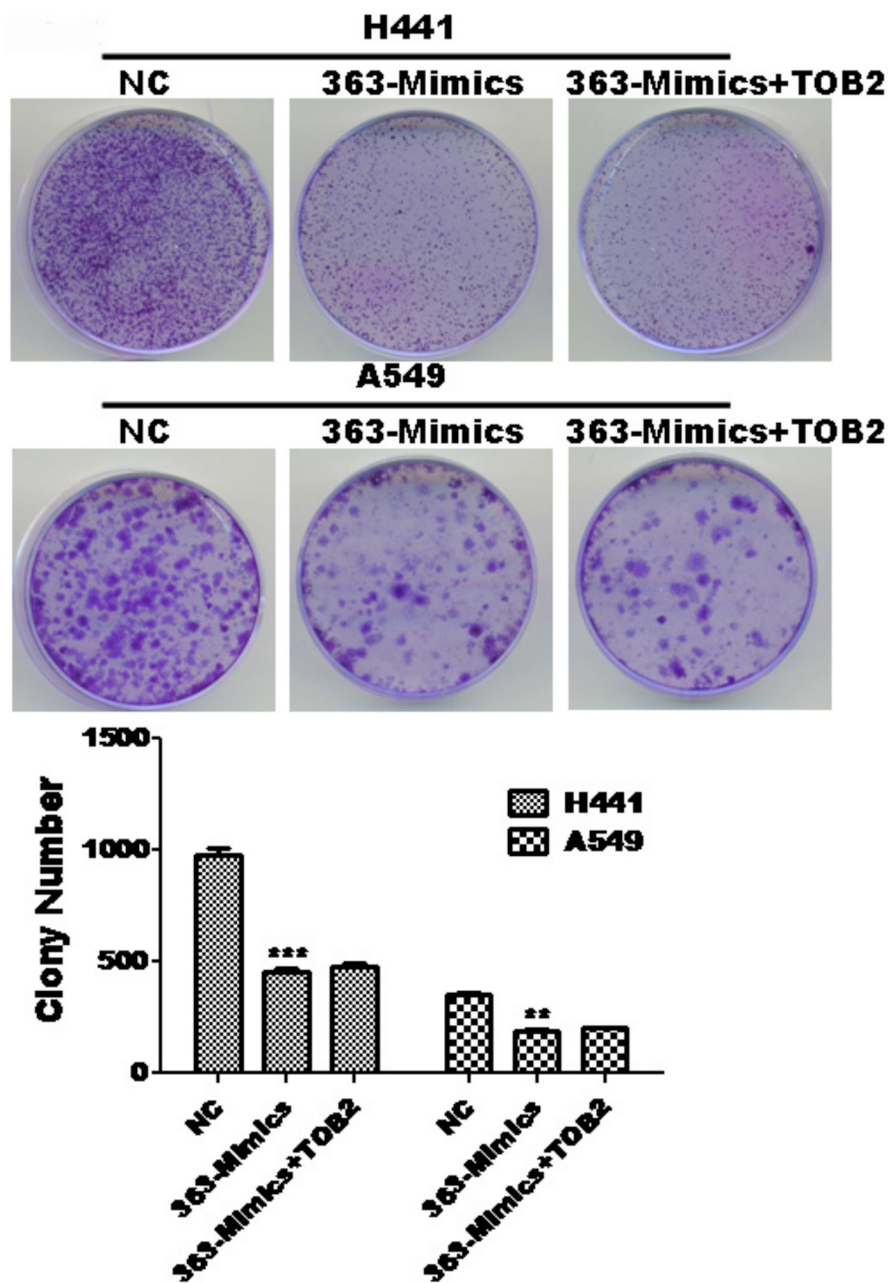

Supplementary Figure 2: Overexpression of Tob2 could not completely abrogate miR-363-3p induced inhibition of A549 and H441 cell growth. Overexpression of miR-363-3p suppressed Cell proliferation by colony formation assays, and both Overexpression of miR-363-3p and Tob2 could not restored ability of cell proliferation. The data is expressed as the mean ± SEM (n=3), with results representative of 3 independent experiments shown. (\*\*, P<0.01, vs. NC).

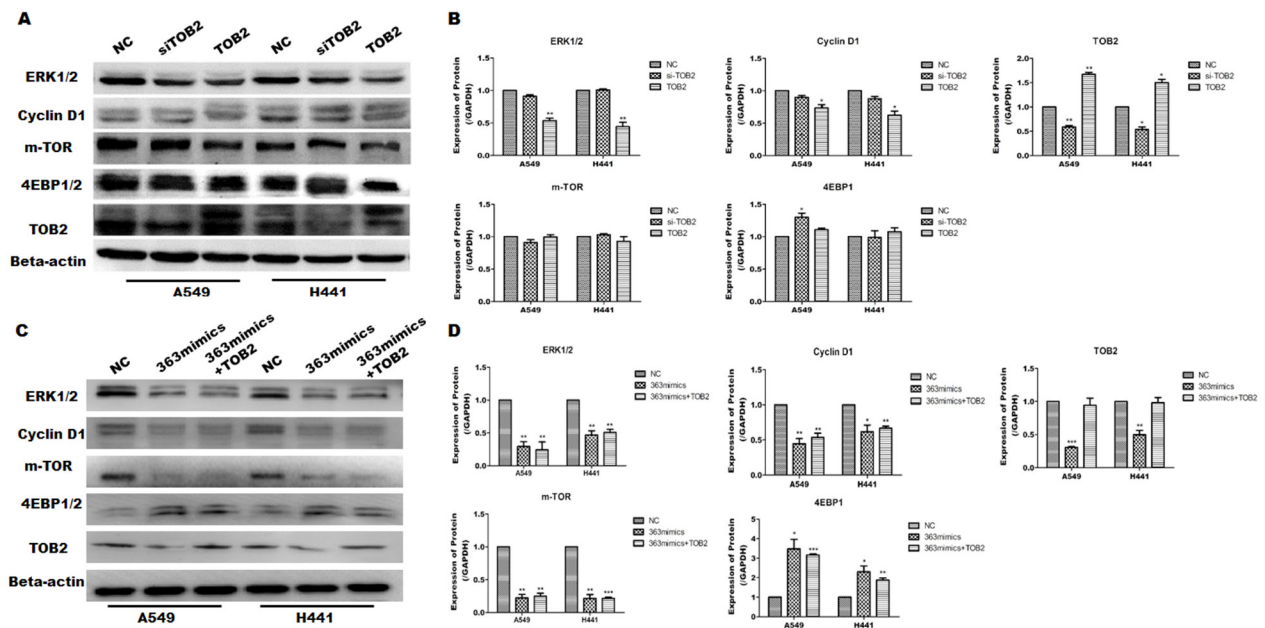

**Supplementary Figure 3:** A. Silencing Tob2 or overexpressed tob2 in A549 and H441 cell, and expression of mTOR-4EBP1 pathway and the Erk-cyclin D1 pathway was examined by Western blotting. B. Quantification of the results in panel A. C. Both Overexpression of miR-363-3p and Tob2 in A549 and H441 cell, and tob2 could not restored expression of mTOR-4EBP1 pathway and the Erk-cyclin D1 pathway. D. Quantification of the results in panel C. The data is expressed as the mean ± SEM (n=3), with results representative of 3 independent experiments shown. (\*, P<0.01; \*\*, P<0.01; \*\*\*, P<0.01 vs. NC).

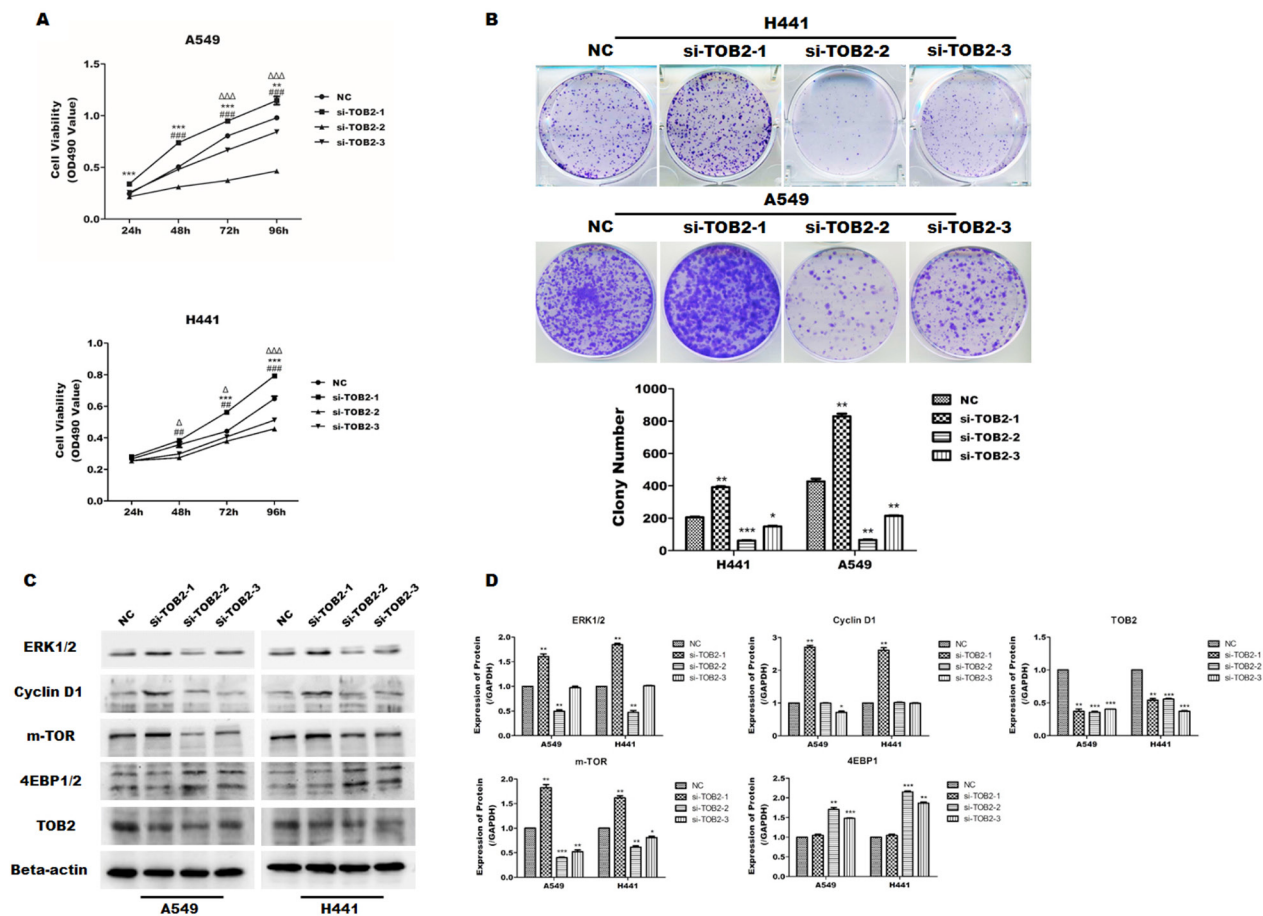

**Supplementary Figure 4:** A549 and H441 cells were infected with negative control (NC), siTOB2-1 (Silencing tob2), siTOB2-2 (Silencing tob2) or siTOB2-3 (Silencing tob2) and **A.** seeded into 96-well culture plates at a density of  $5 \times 10^3$  cells/well. Cell proliferation was subsequently assessed by MTT assay at the indicated times. (\*\*  $P < 0.01$ , \*\*\*  $P < 0.001$ , siTOB2-1 vs. NC; ###  $P < 0.01$ , ####  $P < 0.001$ , siTOB2-2 vs. NC;  $\Delta\Delta P < 0.01$ ,  $\Delta\Delta\Delta P < 0.001$ , siTOB2-3 vs. NC). **B.** 500 cells/well were seeded in plates and the medium was changed every 4 days. After 14 days, the plates were stained for the formation of cell colonies with crystal violet dye (upper panel) and the number of colonies was counted (lower panel). The data are expressed as the means  $\pm$  SEM (n = 3), with results representative of 3 independent experiments shown. (\*\*  $P < 0.01$ , \*\*\*  $P < 0.001$  vs. NC).

**Supplementary Table 1: Sequences of siRNA for Tob2**

| Name     | Sequences(5'-3')                                |
|----------|-------------------------------------------------|
| siTOB2-1 | GCCUGAACUUCAUCUCUTT<br>AGAUGAUGAAGUUCAGGGCTT    |
| siTOB2-2 | CCAAAUUUGGCCUCCACUAATT<br>UUAGUGGAGCCAAAUUUGGTT |
| siTOB2-3 | CCUGGAGAAGACACCCUUUTT<br>AAAGGGUGUCUUCUCCAGGTT  |
| siTOB2   | Purchased from Santa Cruz                       |

**Supplementary Table 2: Information of antibody**

| <b>Name</b>     | <b>host species</b> | <b>company</b> | <b>catalogue</b> | <b>dilution</b> | <b>monoclonal(M)/polyclonal(P)</b> |
|-----------------|---------------------|----------------|------------------|-----------------|------------------------------------|
| $\beta$ -actin  | Rabbit              | Santa Cruz     | SC-130656        | 1:500           | M                                  |
| $\beta$ -tublin | Mouse               | Earth          | E021040          | 1:500           | M                                  |
| GAPDH           | Rabbit              | Cell Signaling | 2118             | 1:1000          | P                                  |
| Cyclin D1       | Rabbit              | Cell Signaling | 2978             | 1:500           | P                                  |
| mTOR            | Rabbit              | Cell Signaling | 2983             | 1:500           | P                                  |
| ERK1/2          | Rabbit              | Cell Signaling | 4695             | 1:500           | P                                  |
| 4E-BP1          | Rabbit              | Cell Signaling | 9644             | 1:500           | P                                  |
| CDK2            | Rabbit              | Cell Signaling | 2546             | 1:500           | M                                  |
| BAX             | Rabbit              | Cell Signaling | 5023             | 1:500           | P                                  |
| BAK             | Rabbit              | Cell Signaling | 6947             | 1:500           | P                                  |
| PCNA            | Rabbit              | SangonBiotech  | D220014          | 1:1000          | P                                  |
| TOB2            | Mouse               | Abcam          | ab56760          | 1:500           | M                                  |
